# Supplementary material for: Proton conductive watery channels constructed by Anderson polyanions and lanthanide coordination cations
Source: Royal Society of Chemistry journal article supplement (doi:10.1039/c4dt01715c), 2014-01-01
Supplement: c4dt01715c1.pdf [file c4dt01715c1.pdf]

## ***Electronic Supplementary Information***

### **Proton conductive watery channels constructed by Anderson polyanions and lanthanide coordination cations**

Jun Miao,<sup>a</sup> Yiwei Liu,<sup>a</sup> Qun Tang,<sup>a</sup> Guocheng Yang,<sup>b</sup> Zhan Shi<sup>c</sup>, Shuxia Liu<sup>a\*</sup> and Qingyin Wu<sup>d</sup>

<sup>a</sup>Key Lab of Polyoxometalate Science, Department of Chemistry, Northeast Normal University, Changchun 130024, PR China. E-mail: liusx@nenu.edu.cn; Fax: +86-431-85099328; Tel: +86-431-85099328

<sup>b</sup>School of Chemistry and Life Science, Changchun University of Technology, Changchun 130012, China.

<sup>c</sup>State Key Laboratory of Inorganic Synthesis and Preparative Chemistry, College of Chemistry, Jilin University, Changchun, 130012, PR China.

<sup>d</sup>Department of Chemistry, Zhejiang University, Hangzhou 310027, PR China.

#### **The infrared analyses**

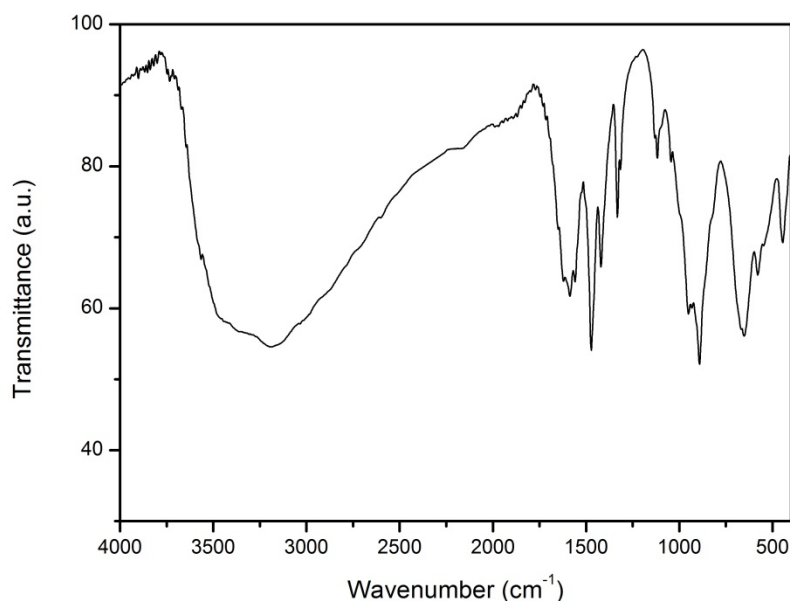

**Fig. S1** IR spectrum of **1**.

## Thermogravimetric analyses

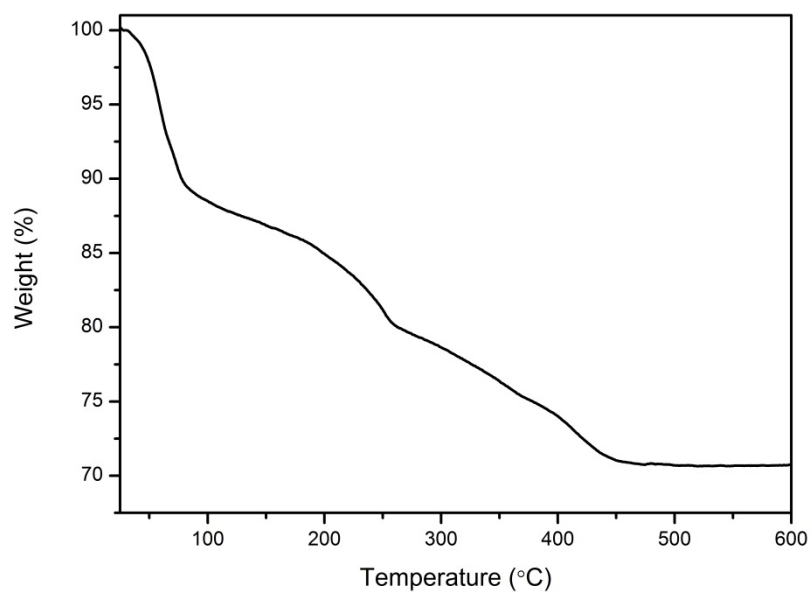

Fig. S2 TGA of **1** under N<sub>2</sub>.

## Water adsorption-desorption study

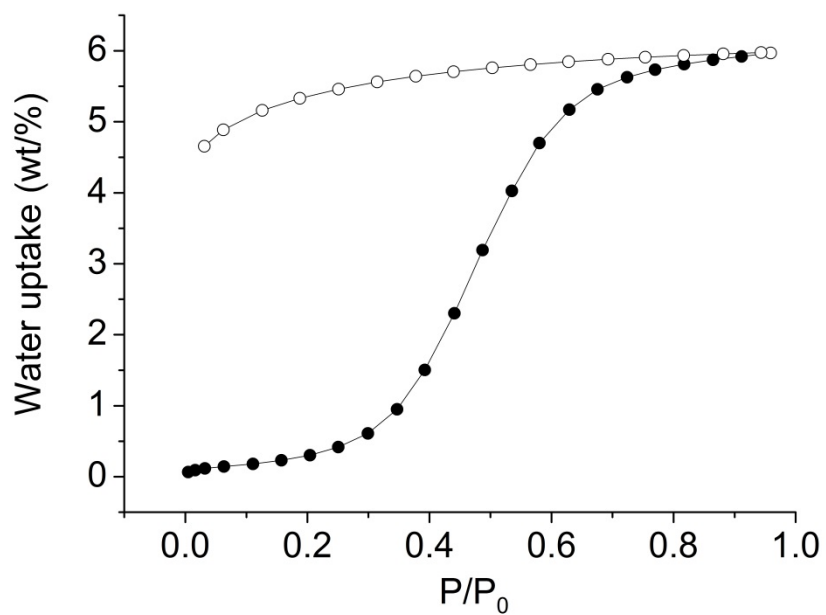

Fig. S3 Water adsorption and desorption isotherm of **1** at 298 K.

## Proton conductivity

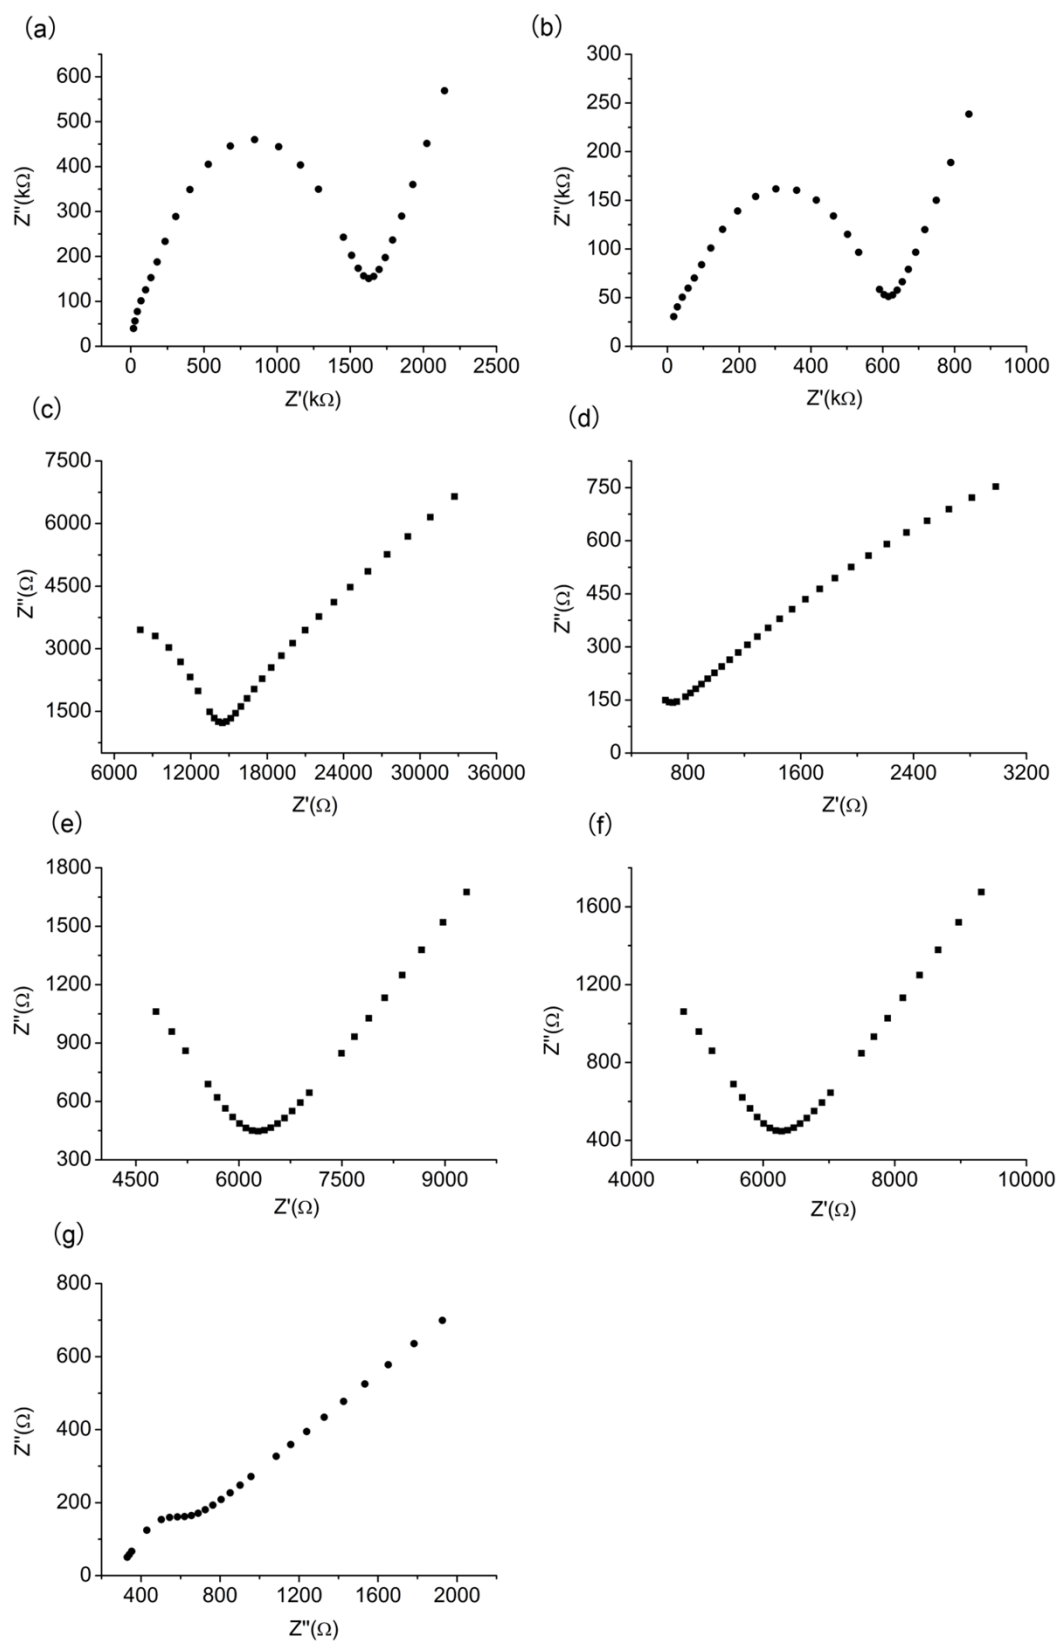

**Fig. S4** Nyquist plots for **1** at 25°C (a), 30°C (b), 40°C (c), 50°C (d), 60°C (e), 70°C (f) and 80°C (g) under 95% relative humidity.

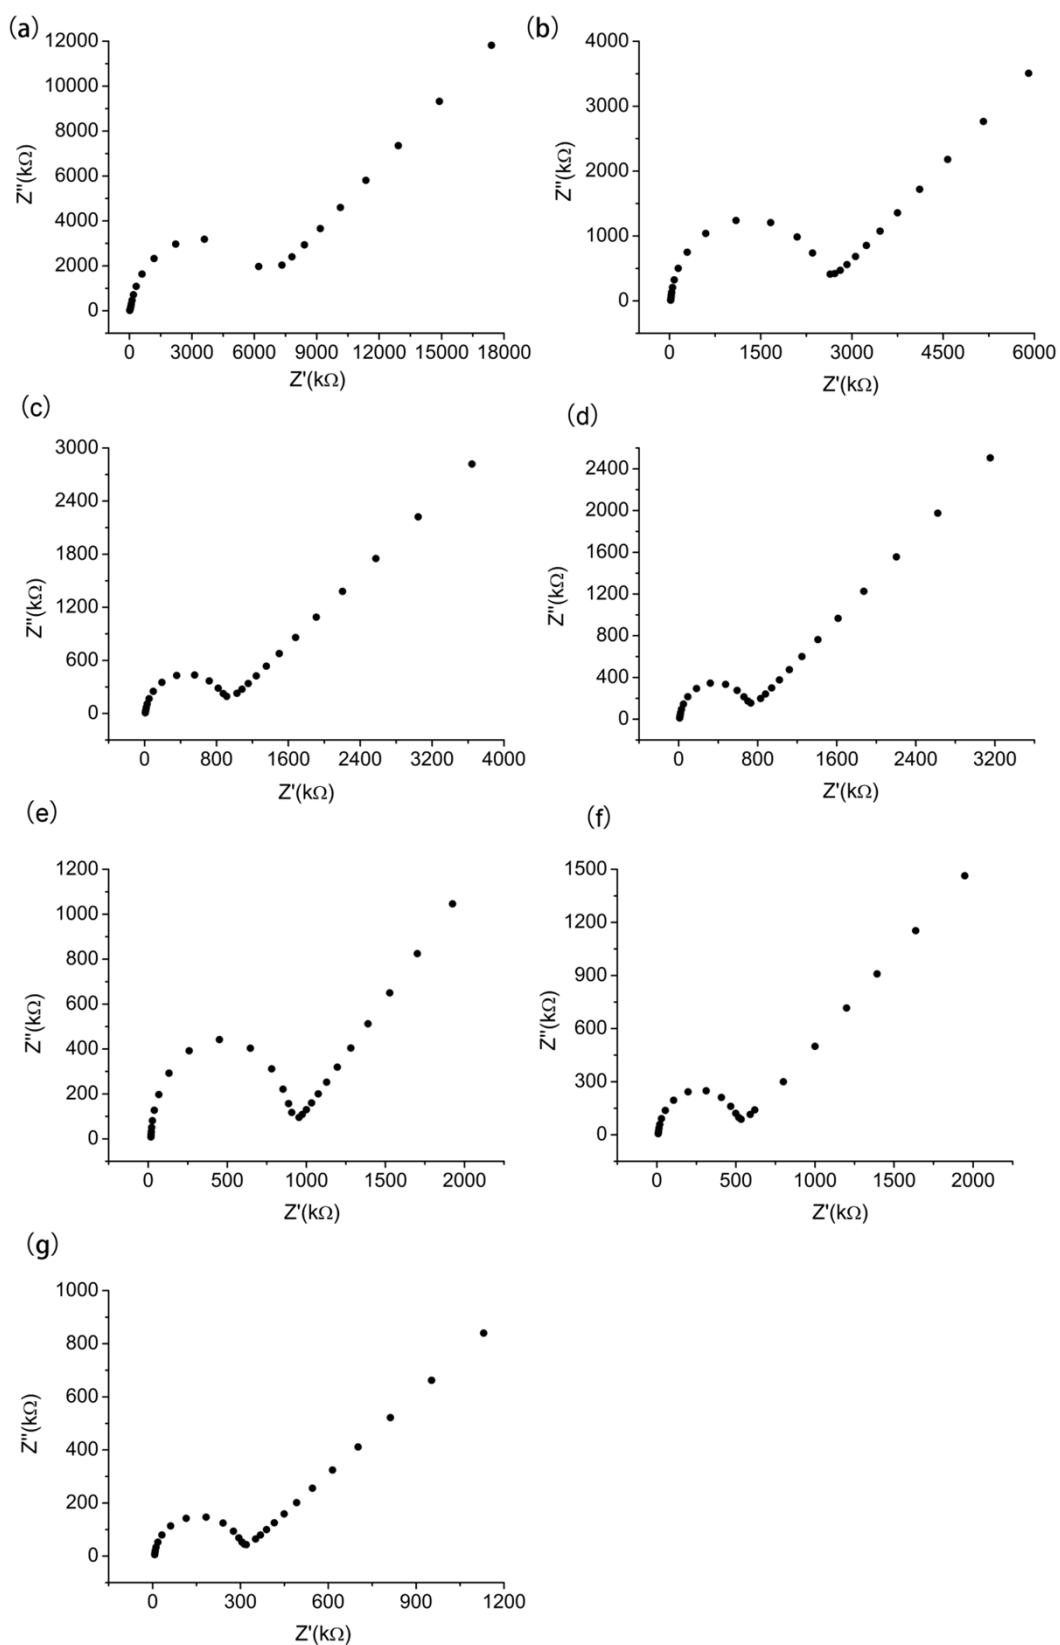

**Fig. S5** Nyquist plots for  $\text{La}(\text{H}_2\text{O})_7[\text{Al}(\text{OH})_6\text{Mo}_6\text{O}_{18}] \cdot 4\text{H}_2\text{O}$  at 25°C (a), 30°C (b), 40°C (c), 50°C (d), 60°C (e), 70°C (f) and 80°C (g) under 95% relative humidity.

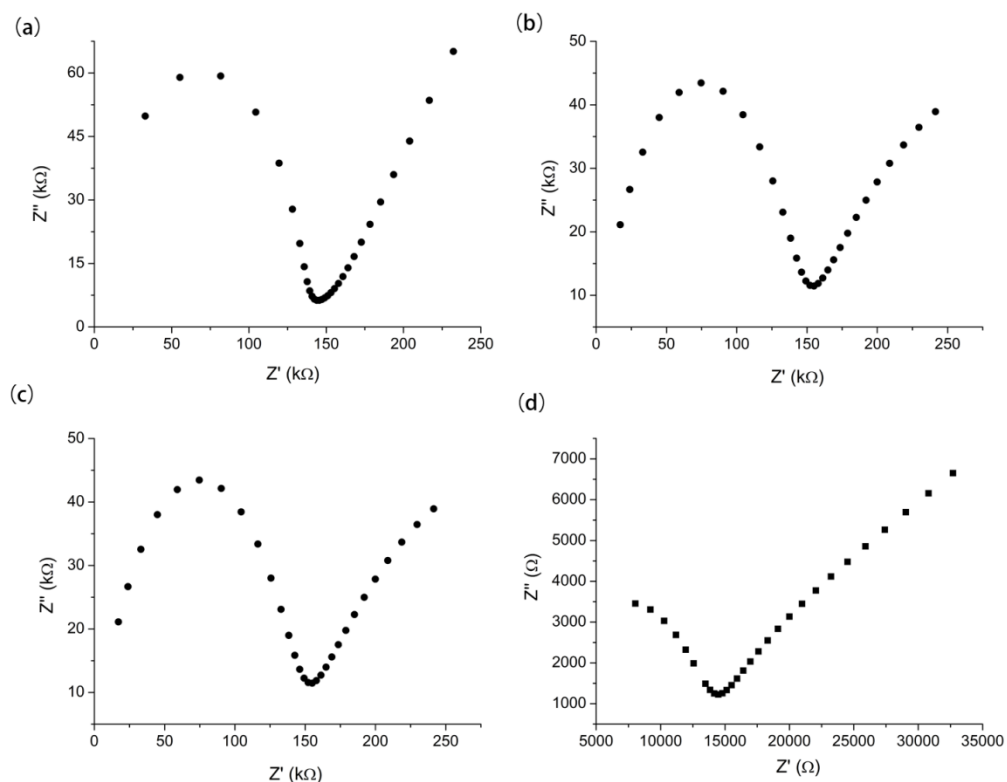

**Fig. S6** Nyquist plots  
for  $\text{La}(\text{H}_2\text{O})_7[\text{Al}(\text{OH})_6\text{Mo}_6\text{O}_{18}] \cdot 4\text{H}_2\text{O}$  under 35%, 50%, 65% and 80% relative humidity at 80°C.

### Schematic representation of proton conduction

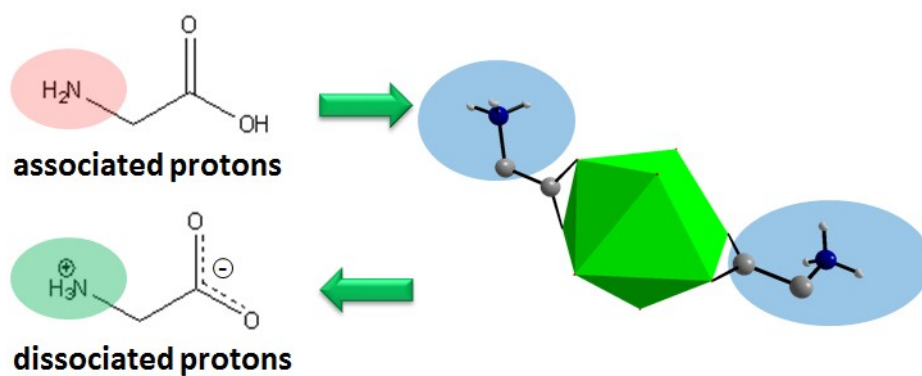

**Fig. S7** Distribution of protons from glycine before and after coordination.

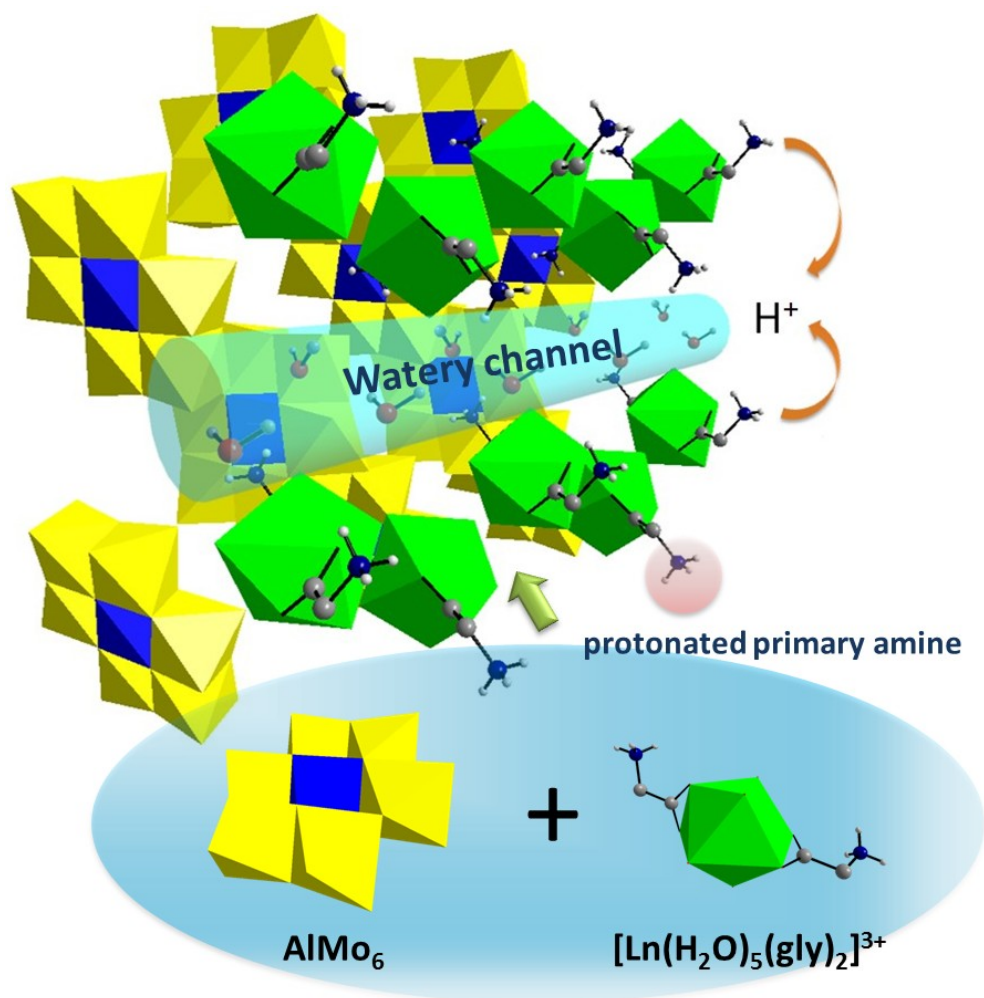

**Fig. S8** Schematic representation of proton conduction in the channel of ionic networks constructed by Anderson-type polyanions ( $\text{AlMo}_6$ ) and Ln coordination cation,  $[\text{Ln}(\text{H}_2\text{O})_5(\text{gly})_2]^{3+}$ . Colour code: Al, blue octahedron; Mo, yellow octahedron; Sm, green polyhedron; N, mazarine; C, gray; O, red.

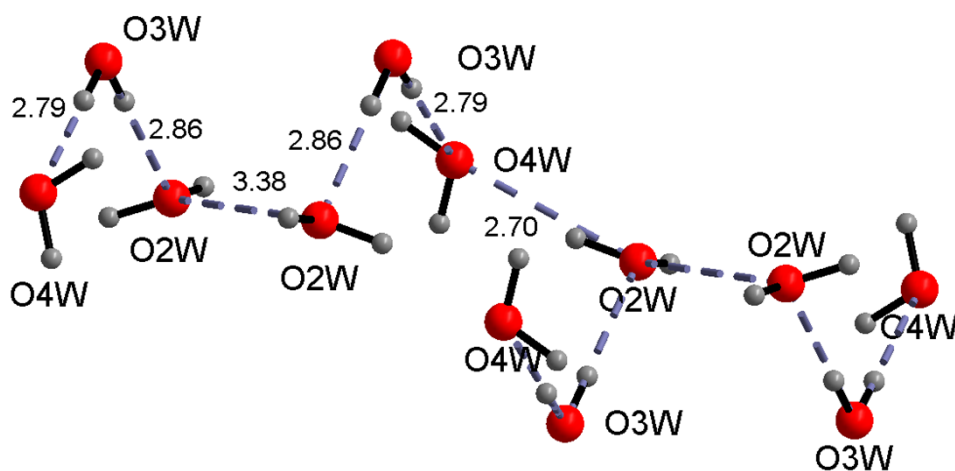

**Fig. S9** Close contacts (2.70 Å ~ 3.38 Å) between the O atoms within a water channel.

#### Additional structural details

The contrasting compound,  $\text{La}(\text{H}_2\text{O})_7[\text{AlMo}_6]$  ( $[\text{AlMo}_6]^{3-} = [\text{Al}(\text{OH})_6\text{Mo}_6\text{O}_{18}]^{3-}$ ) consists of one-dimensional chains, built by alternating  $[\text{AlMo}_6]^{3-}$  polyanions and  $[\text{La}(\text{H}_2\text{O})_7]^{3+}$  cations, as shown in Fig. S9. The  $[\text{AlMo}_6]^{3-}$  acts as a bidentate ligand and two  $[\text{La}(\text{H}_2\text{O})_7]^{3+}$  fragments are coordinated to two terminal oxygen atoms of the polyanion. There are extensive hydrogen bonds among surface of oxygen atoms of the Anderson-type polyanions, coordinated waters, and lattice water molecules.<sup>1</sup>

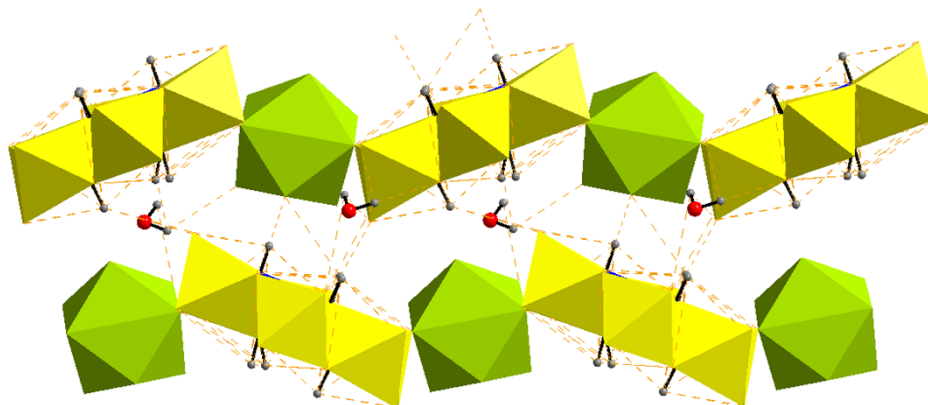

**Fig. S10** Hydrogen bonding interactions among surface of oxygen atoms of the Anderson-type polyanions, coordinated waters, and lattice water molecules. Colour code: Al, blue octahedron; Mo, yellow octahedron; La, lime polyhedron; H, grey; O, red.

**Reference**

1. V. Shivaiah, P. V. Narasimha Reddy, L. Cronin and S. K. Das, *J. Chem. Soc., Dalton Trans.*, 2002, 3781-3782.
